24. Patton KK, Ellinor PT, Heckbert SR, Christenson RH, DeFilippi C, Gottdiener JS, Kronmal RA. N-terminal pro-B-type natriuretic peptide is a major predictor of the development of atrial fibrillation: the Cardiovascular Health Study. *Circulation* 2009;**120**:1768–1774.
25. Wang TJ, Larson MG, Levy D, Benjamin EJ, Leip EP, Omland T, Wolf PA, Vasani RS. Plasma natriuretic peptide levels and the risk of cardiovascular events and death. *N Engl J Med* 2004;**350**:655–663.
26. Smith JG, Newton-Cheh C, Almgren P, Melander O, Platonov PG. Genetic polymorphisms for estimating risk of atrial fibrillation in the general population: a prospective study. *Arch Intern Med* 2012;**172**:742–744.
27. Pencina MJ, D'Agostino RB, Pencina KM, Janssens AC, Greenland P. Interpreting incremental value of markers added to risk prediction models. *Am J Epidemiol* 2012;**176**:473–481.
28. Cook NR. Clinically relevant measures of fit? A note of caution. *Am J Epidemiol* 2012;**176**:488–491.
29. Schnabel RB, Aspelund T, Li G, Sullivan LM, Suchy-Dicey A, Harris TB, Pencina MJ, D'Agostino RB Sr, Levy D, Kannel WB, Wang TJ, Kronmal RA, Wolf PA, Burke GL, Launer LJ, Vasani RS, Psaty BM, Benjamin EJ, Gudnason V, Heckbert SR. Validation of an atrial fibrillation risk algorithm in whites and African Americans. *Arch Intern Med* 2010;**170**:1909–1917.

## CARDIOVASCULAR FLASHLIGHT

doi:10.1093/eurheartj/eh173  
Online publish-ahead-of-print 22 May 2013

### Granulomatous mass adherent to a patent foramen ovale occluder

Yann Ancedy\*, Anne Bernard Brunet, Laurent Quilliet, Alain Mirza, and Laurent Fauchier

Service de Cardiologie, Pôle Cur Thorax Vasculaire, Centre Hospitalier Universitaire Trousseau et Faculté de Médecine, Université François Rabelais, Tours, France

\*Corresponding author. Tel: +33 247474650, Fax: +33 247475919, Email: yann.ancedy@gmail.com

A 70-year-old woman with a history of repeated cerebrovascular events and patent foramen ovale (PFO) closure with PREMERE occluder (St Jude Medical, St Paul, MN, USA) had a recurrence of transient left hemiparesis. Transoesophageal echocardiography (TOE) revealed an intracardiac mass on the left side of the PFO closure system (8 × 8 mm) (Panel A). Despite oral anticoagulation, TOE performed 2 months later found persistent mass (Panel B). Surgical removal of the PFO occluder with the linked mass (Panel C, arrow) and the closure of the atrial communication were, therefore, performed. Histology concluded to a granulomatous formation. Exogenous structures (Panel D) that may come from the occluder were found in the tissue and participated to an inflammatory reaction associated with fibrosis. To our knowledge, this is the first report of a granulomatous mass which needed removal of a PFO occluder. Beyond its debated indication, this highlights that the PFO closure may have rare but still unknown and not negligible complications.

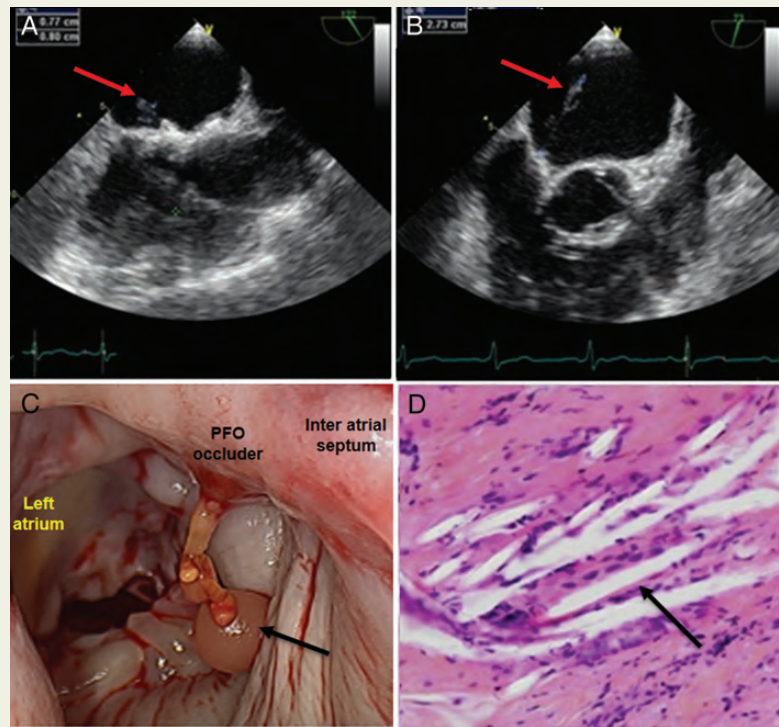

Source: https://academic.oup.com/eurheartj/article-pdf/34/29/2251/17896314/eht173.pdf
